# Supplementary material
Source: PubMed Central journal article supplement (PMC5815893)
Supplement: NIHMS918945-supplement-supplement_1.pdf [file NIHMS918945-supplement-supplement_1.pdf]

1

2 **Supplemental Information**

3

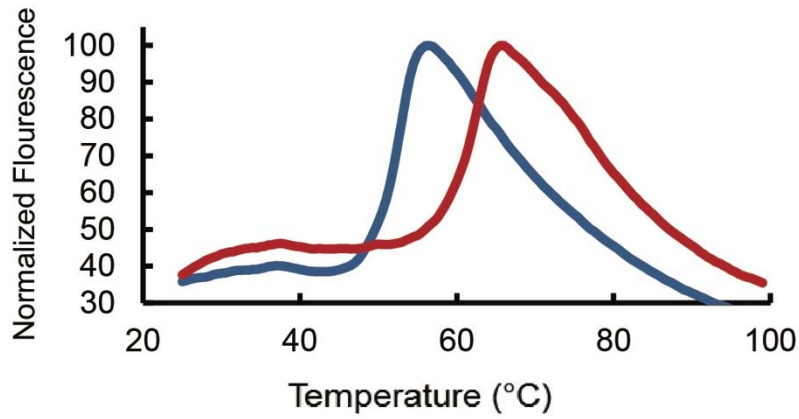

4

5 **Supplemental Figure 1. DNA binding increases the stability of Cascade.** Differential scanning  
6 fluorimetry of unbound Cascade (blue) and the dsDNA bound form of Cascade (red). The increase in  
7 melting temperature after dsDNA binding indicates that the complex is more stable.

8

# A Cse1

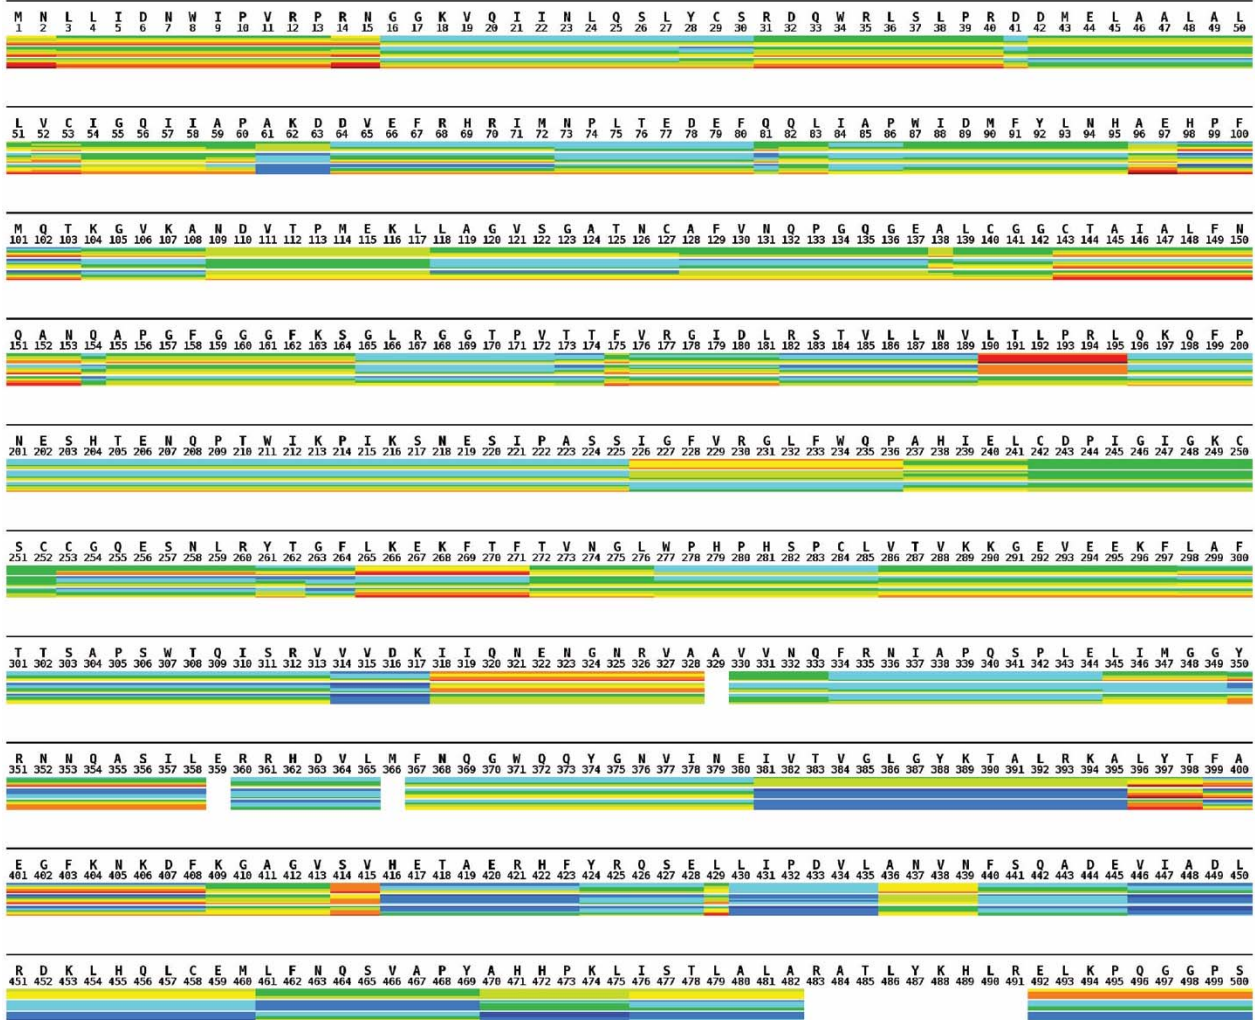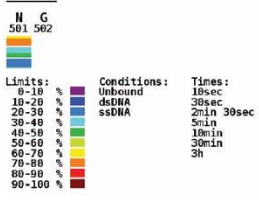

M N L L I D N W I P V R P R N G G K V Q I I H L O S L Y C S R D Q W R L S L P R D D H E L A A L A L  
1 2 3 4 5 6 7 8 9 10 11 12 13 14 15 16 17 18 19 20 21 22 23 24 25 26 27 28 29 30 31 32 33 34 35 36 37 38 39 40 41 42 43 44 45 46 47 48 49 50

L V C I G Q I I A P A K D D V E F R H R I M N P L T E D E F Q Q L I A P W I D M F Y L N H A E H P F  
51 52 53 54 55 56 57 58 59 60 61 62 63 64 65 66 67 68 69 70 71 72 73 74 75 76 77 78 79 80 81 82 83 84 85 86 87 88 89 90 91 92 93 94 95 96 97 98 99 100

M O T K G V K A N D V T P H E K L L A G V S G A T N C A F V W O P G Q G E A L C G G C T A I A L F N  
101 102 103 104 105 106 107 108 109 110 111 112 113 114 115 116 117 118 119 120 121 122 123 124 125 126 127 128 129 130 131 132 133 134 135 136 137 138 139 140 141 142 143 144 145 146 147 148 149 150

Q A N Q A P G F G G G F K S G L R G G T P V T T F V R G I D L R S T V L L N V L T L P R L O K O F P  
151 152 153 154 155 156 157 158 159 160 161 162 163 164 165 166 167 168 169 170 171 172 173 174 175 176 177 178 179 180 181 182 183 184 185 186 187 188 189 190 191 192 193 194 195 196 197 198 199 200

N E S H T E N Q P T W I K P I K S N E S I P A S S I G F V R G L F W Q P A H I E L C D P I G I G K C  
201 202 203 204 205 206 207 208 209 210 211 212 213 214 215 216 217 218 219 220 221 222 223 224 225 226 227 228 229 230 231 232 233 234 235 236 237 238 239 240 241 242 243 244 245 246 247 248 249 250

S C C G O E S N L R Y T G F L K E K F T F T V N G L W P H P H S P C L V T V K K G E V E E K F L A F  
251 252 253 254 255 256 257 258 259 260 261 262 263 264 265 266 267 268 269 270 271 272 273 274 275 276 277 278 279 280 281 282 283 284 285 286 287 288 289 290 291 292 293 294 295 296 297 298 299 300

T T S A P S W T Q I S R V V V D K I T O N E N G N R V A A V V N Q F R N I A P O S P L E L I M G G Y  
301 302 303 304 305 306 307 308 309 310 311 312 313 314 315 316 317 318 319 320 321 322 323 324 325 326 327 328 329 330 331 332 333 334 335 336 337 338 339 340 341 342 343 344 345 346 347 348 349 350

R N N Q A S I L E R R H D V L M F N Q G W Q Q Y G N V I N E I V T V G L G Y K T A L R K A L Y T F A  
351 352 353 354 355 356 357 358 359 360 361 362 363 364 365 366 367 368 369 370 371 372 373 374 375 376 377 378 379 380 381 382 383 384 385 386 387 388 389 390 391 392 393 394 395 396 397 398 399 400

E G F K N K D F K G A G V S V H E T A E R H F Y R O S E L L I P D V L A N V N F S Q A D E V I A D L  
401 402 403 404 405 406 407 408 409 410 411 412 413 414 415 416 417 418 419 420 421 422 423 424 425 426 427 428 429 430 431 432 433 434 435 436 437 438 439 440 441 442 443 444 445 446 447 448 449 450

R D K L H Q L C E H L F N O S V A P Y A H H P K L I S T L A L A R A T L Y K H L R E L K P O G G P S  
451 452 453 454 455 456 457 458 459 460 461 462 463 464 465 466 467 468 469 470 471 472 473 474 475 476 477 478 479 480 481 482 483 484 485 486 487 488 489 490 491 492 493 494 495 496 497 498 499 500

N G  
501 502

Csel: 489 of 502 - 97%  
Total: 489 of 502 - 97%

# B Cse2

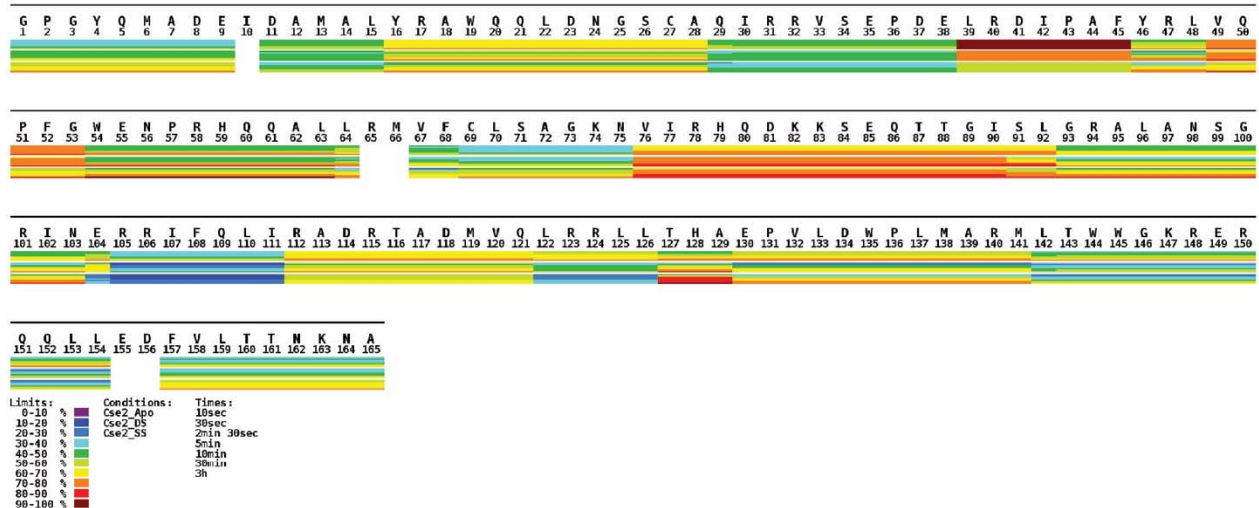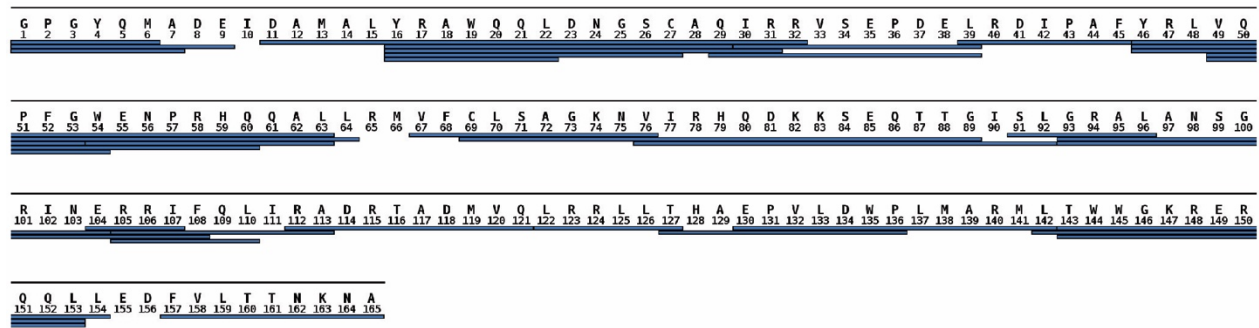

2  
 Cse2: 160 of 165 ~ 97%  
 Total: 160 of 165 ~ 97%

# C Cas7

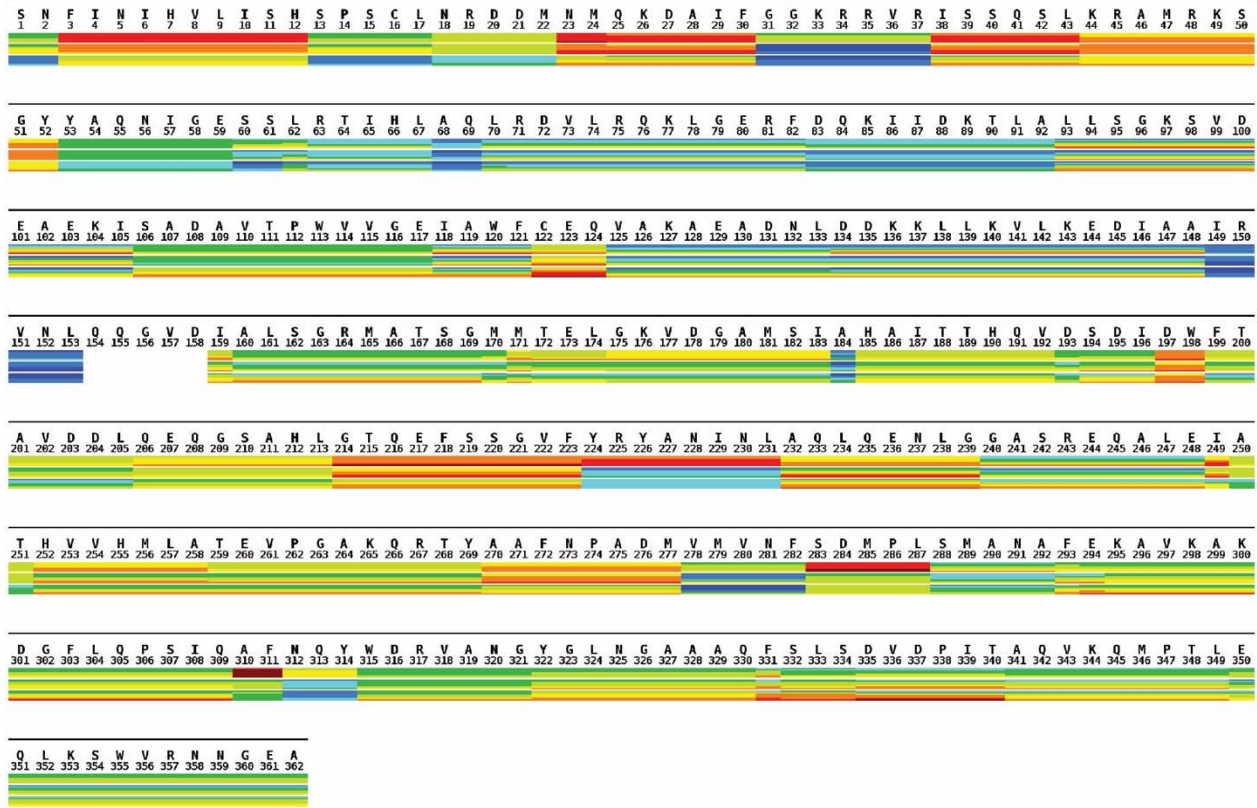

**Limits:**  
 0-10 %  
 10-20 %  
 20-30 %  
 30-40 %  
 40-50 %  
 50-60 %  
 60-70 %  
 70-80 %  
 80-90 %  
 90-100 %

**Conditions:**  
 Unbound  
 dsDNA  
 ssDNA

**Times:**  
 10sec  
 30sec  
 2min 30sec  
 5min  
 10min  
 30min  
 3h

S N F I N I H V L I S H S P S C L N R D D H H Q K D A I F G G K R R V R I S S O S L K R A H R K S  
1 2 3 4 5 6 7 8 9 10 11 12 13 14 15 16 17 18 19 20 21 22 23 24 25 26 27 28 29 30 31 32 33 34 35 36 37 38 39 40 41 42 43 44 45 46 47 48 49 50

G Y Y A Q N I G E S S L R T I H L A Q L R D V L R Q K L G E R F D Q K I I D K T L A L L S G K S V D  
51 52 53 54 55 56 57 58 59 60 61 62 63 64 65 66 67 68 69 70 71 72 73 74 75 76 77 78 79 80 81 82 83 84 85 86 87 88 89 90 91 92 93 94 95 96 97 98 99 100

E A E K I S A D A V T P W V V G E I A W F C E Q V A K A E A D N L D D K K L L K V L K E D I A A I R  
101 102 103 104 105 106 107 108 109 110 111 112 113 114 115 116 117 118 119 120 121 122 123 124 125 126 127 128 129 130 131 132 133 134 135 136 137 138 139 140 141 142 143 144 145 146 147 148 149 150

V N L Q Q G V D I A L S G R M A T S G M M T E L G K V D G A M S I A H A I T T H Q V D S D I D W F T  
151 152 153 154 155 156 157 158 159 160 161 162 163 164 165 166 167 168 169 170 171 172 173 174 175 176 177 178 179 180 181 182 183 184 185 186 187 188 189 190 191 192 193 194 195 196 197 198 199 200

A V D D L Q E Q G S A H L G T O E F S S G V F Y R Y A N I N L A Q L Q E N L G G A S R E Q A L E I A  
201 202 203 204 205 206 207 208 209 210 211 212 213 214 215 216 217 218 219 220 221 222 223 224 225 226 227 228 229 230 231 232 233 234 235 236 237 238 239 240 241 242 243 244 245 246 247 248 249 250

T H V V H M L A T E V P G A K O R T Y A A F N P A D M V M V N F S D M P L S M A N A F E K A V K A K  
251 252 253 254 255 256 257 258 259 260 261 262 263 264 265 266 267 268 269 270 271 272 273 274 275 276 277 278 279 280 281 282 283 284 285 286 287 288 289 290 291 292 293 294 295 296 297 298 299 300

D G F L Q P S I Q A F N Q Y W D R V A N G Y G L M G A A A O F S L S D V D P I T A Q V K Q M P T L E  
301 302 303 304 305 306 307 308 309 310 311 312 313 314 315 316 317 318 319 320 321 322 323 324 325 326 327 328 329 330 331 332 333 334 335 336 337 338 339 340 341 342 343 344 345 346 347 348 349 350

Q L K S W V R N N G E A  
351 352 353 354 355 356 357 358 359 360 361 362

Cas7: 357 of 362 ~ 99%  
Total: 357 of 362 ~ 99%

# D Cas5

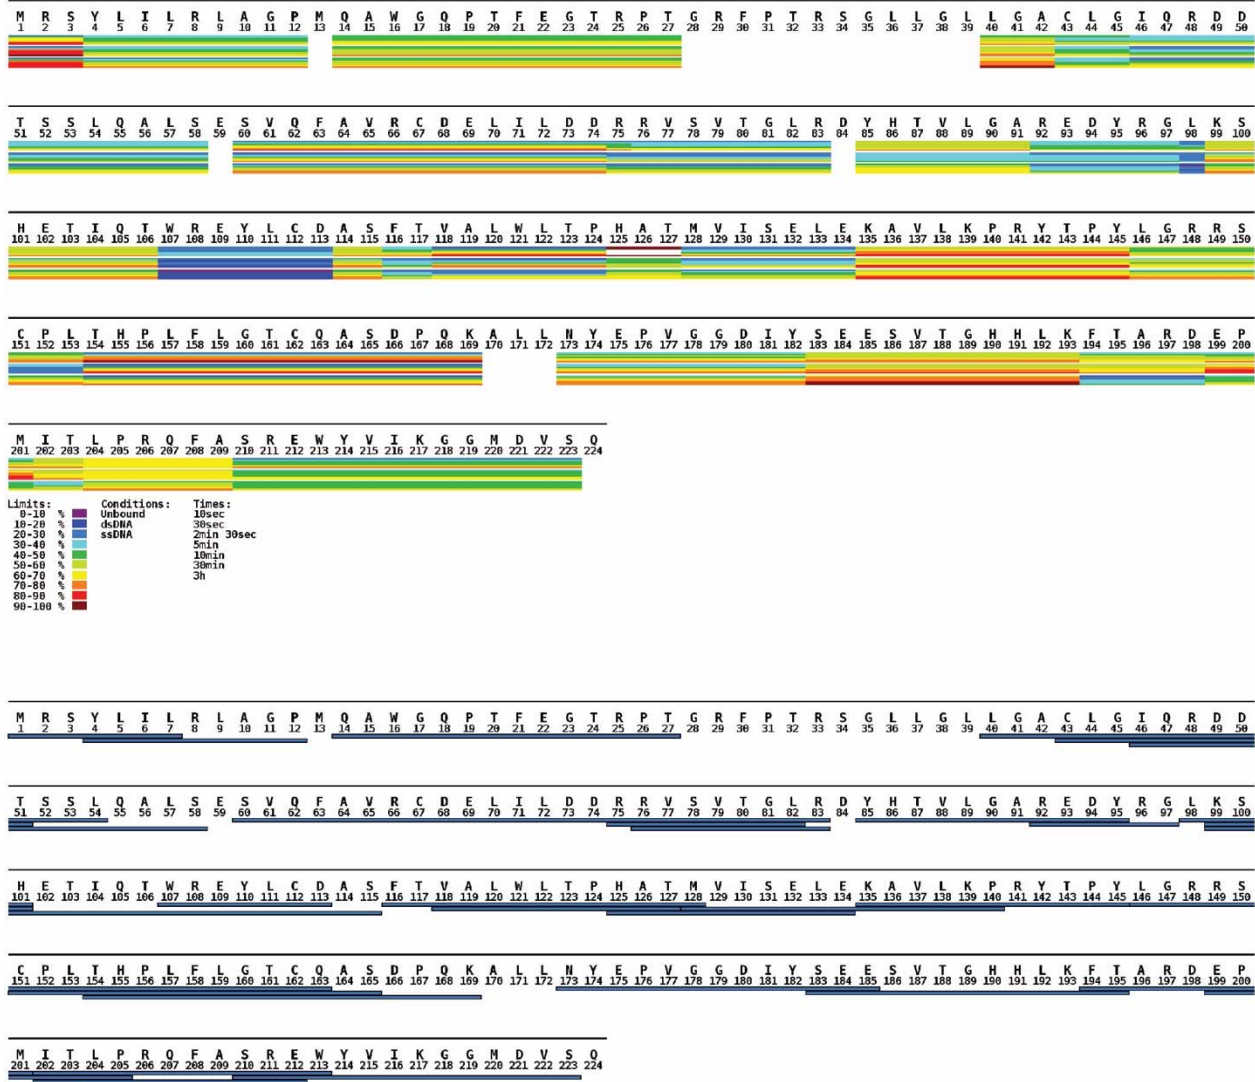

2

Cas5e: 205 of 224 - 92%  
 Total: 205 of 224 - 92%

# E Cas6e

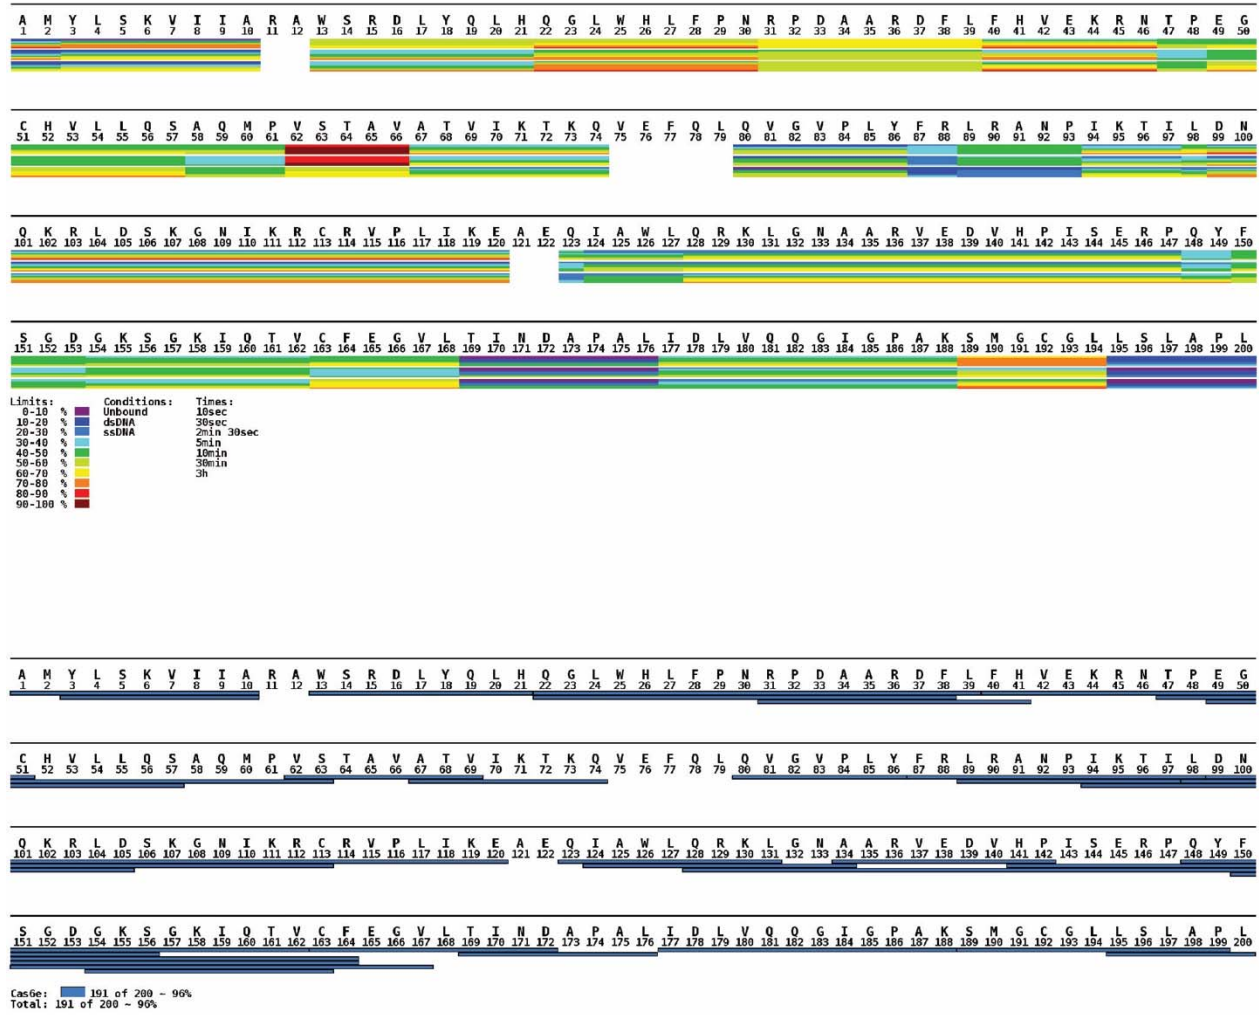

1

2 **Supplemental Figure 2. Heat and coverage maps for all Cascade subunits.** Heat map (colored) and  
 3 coverage map (blue) for each subunit (Cse1 A, Cse2 B, Cas7 C, Cas5e D, and Cas6e E). The heat map  
 4 shows the percentage of deuterium exchanged for each peptide at every time point. Each condition (no  
 5 DNA, dsDNA bound, and ssDNA bound) are displayed as separate rows respectively, with each block  
 6 further divided into rows indicating the tested time points. The percent deuterium uptake is indicated  
 7 by differing colors. Coverage maps for each subunit are shown below each heat map. Each line  
 8 represents a peptide used to measure the deuterium uptake in all conditions. Over 90% sequence  
 9 coverage was achieved for all peptides.

10



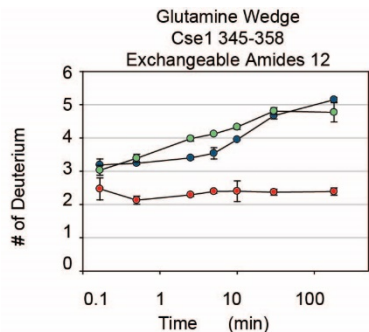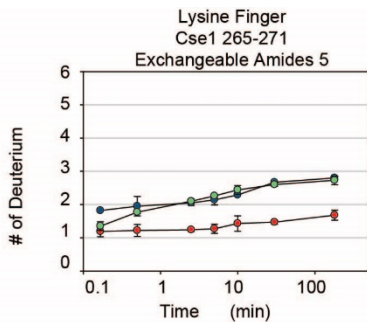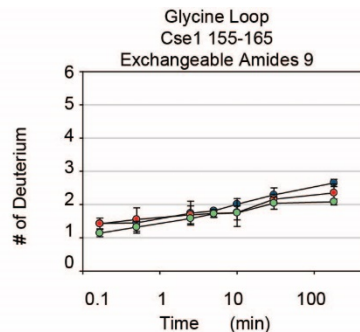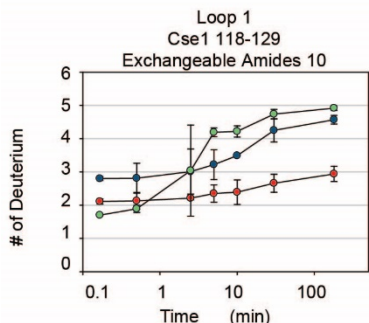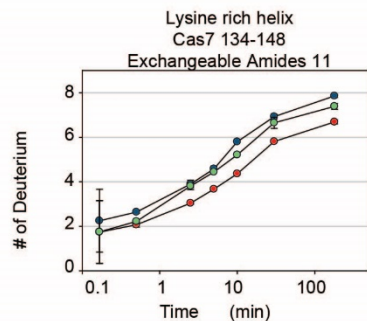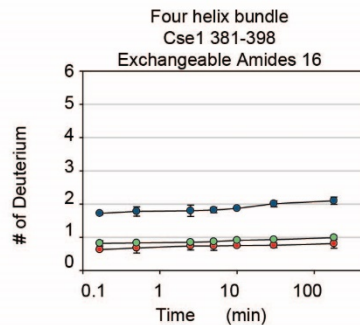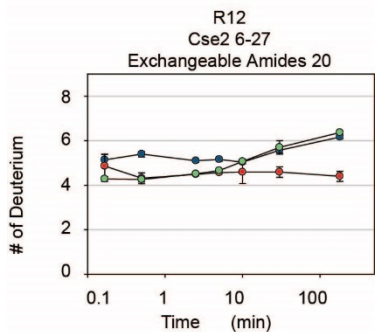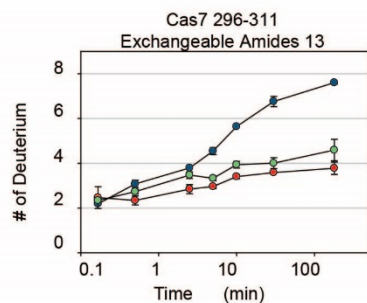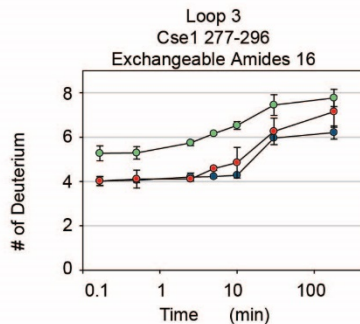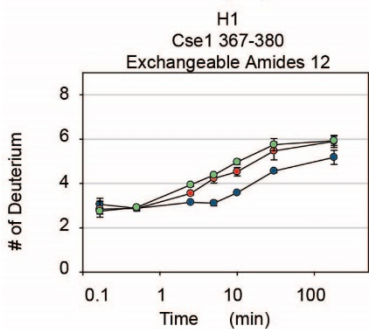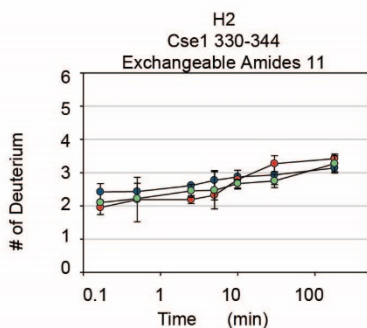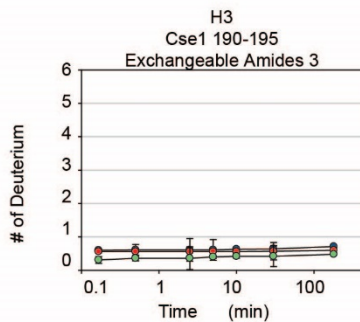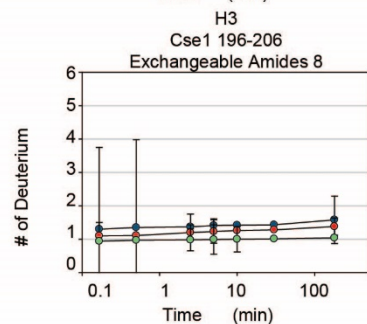

● unbound  
● ssDNA bound  
● dsDNA bound

1 **Supplemental Figure 3. HD-exchange over time.** The number of deuteriums incorporated by specific  
2 peptides are plotted over time. HD-exchange is measured for peptides from Cascade prior to binding  
3 DNA (blue), bound to ssDNA (green), and dsDNA (red) at time points 10 and 30 seconds, 2.5, 5, 10, 30  
4 and 180 minutes. With the exception of the 10-minute data point from the unbound form of Cascade  
5 which was only performed once, the remaining data points are the average of three replicates with the  
6 standard deviation shown as error bars. Error bars are too small to see in some cases. The maximum  
7 number of exchangeable amide hydrogens is indicated and calculated by subtracting two possible  
8 exchangeable amides hydrogens from the peptide length (back exchange) and one additional for each  
9 proline present.

10

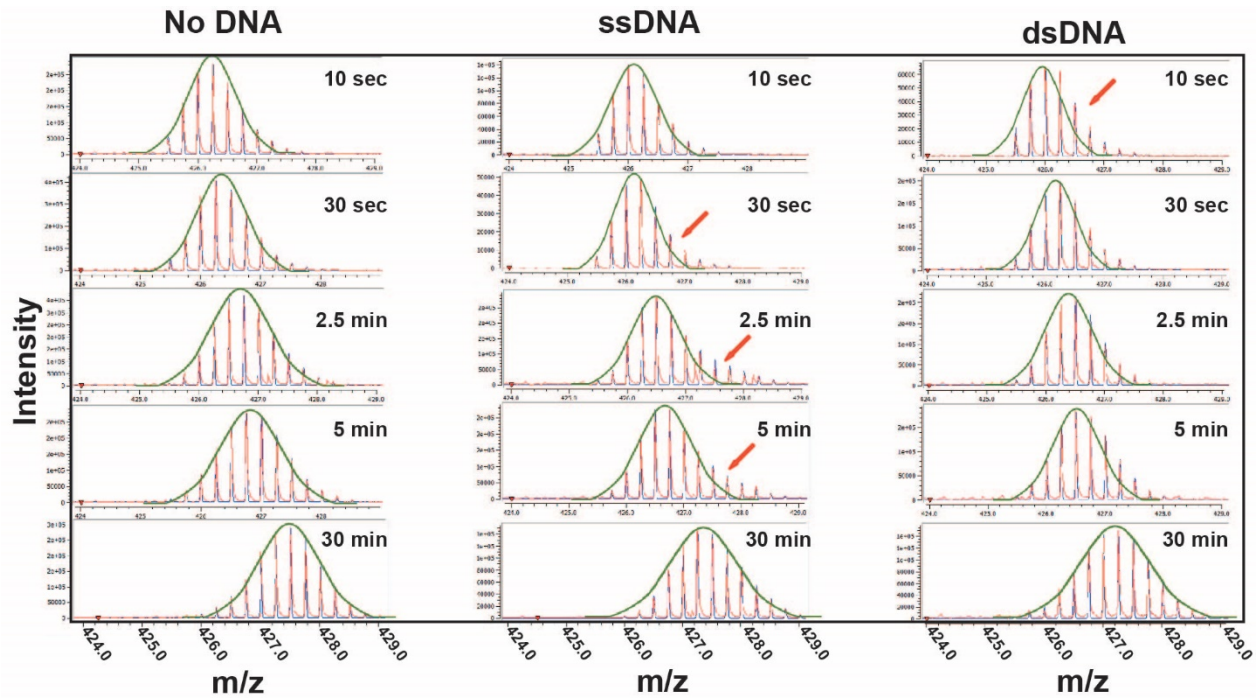

1

2 **Supplemental Figure 4. Peptide covering the lysine-rich helix (Cas7 134-148) displays a bimodal**  
 3 **distribution.** Measured isotopic distributions for the Cas7 peptide 134-148 in Cascade prior to binding  
 4 DNA, bound to ssDNA, and dsDNA bound. The expected isotopic distribution during HDX-MS is shown in  
 5 green. In the absence of DNA (left column), the peptide shows a normal isotopic distribution, which  
 6 shifts to the right over time. This shows the incorporation of deuterium. In the ssDNA bound form  
 7 (middle column), the peptide shows bimodal behavior, which appears at the “leading edge” (red arrows)  
 8 of the normal Gaussian distribution. This leading edge appears after 30 seconds and becomes  
 9 continuously more exaggerated until 30 minutes when the isotopic envelope re-adopts a near Gaussian  
 10 distribution. When dsDNA is bound (right column), the bimodal behavior is observed at the first-time  
 11 point. Similar to behavior measured for the ssDNA bound complex, the profile returns to a near  
 12 Gaussian distribution by 30 minutes. However, the centroid of the isotopic distribution for the dsDNA  
 13 bound form of Cascade lies at a lower m/z value than in the ssDNA bound form. This shows that the  
 14 dsDNA bound form of this peptide is more protected from deuterium exchange than the ssDNA bound  
 15 form.

16

17

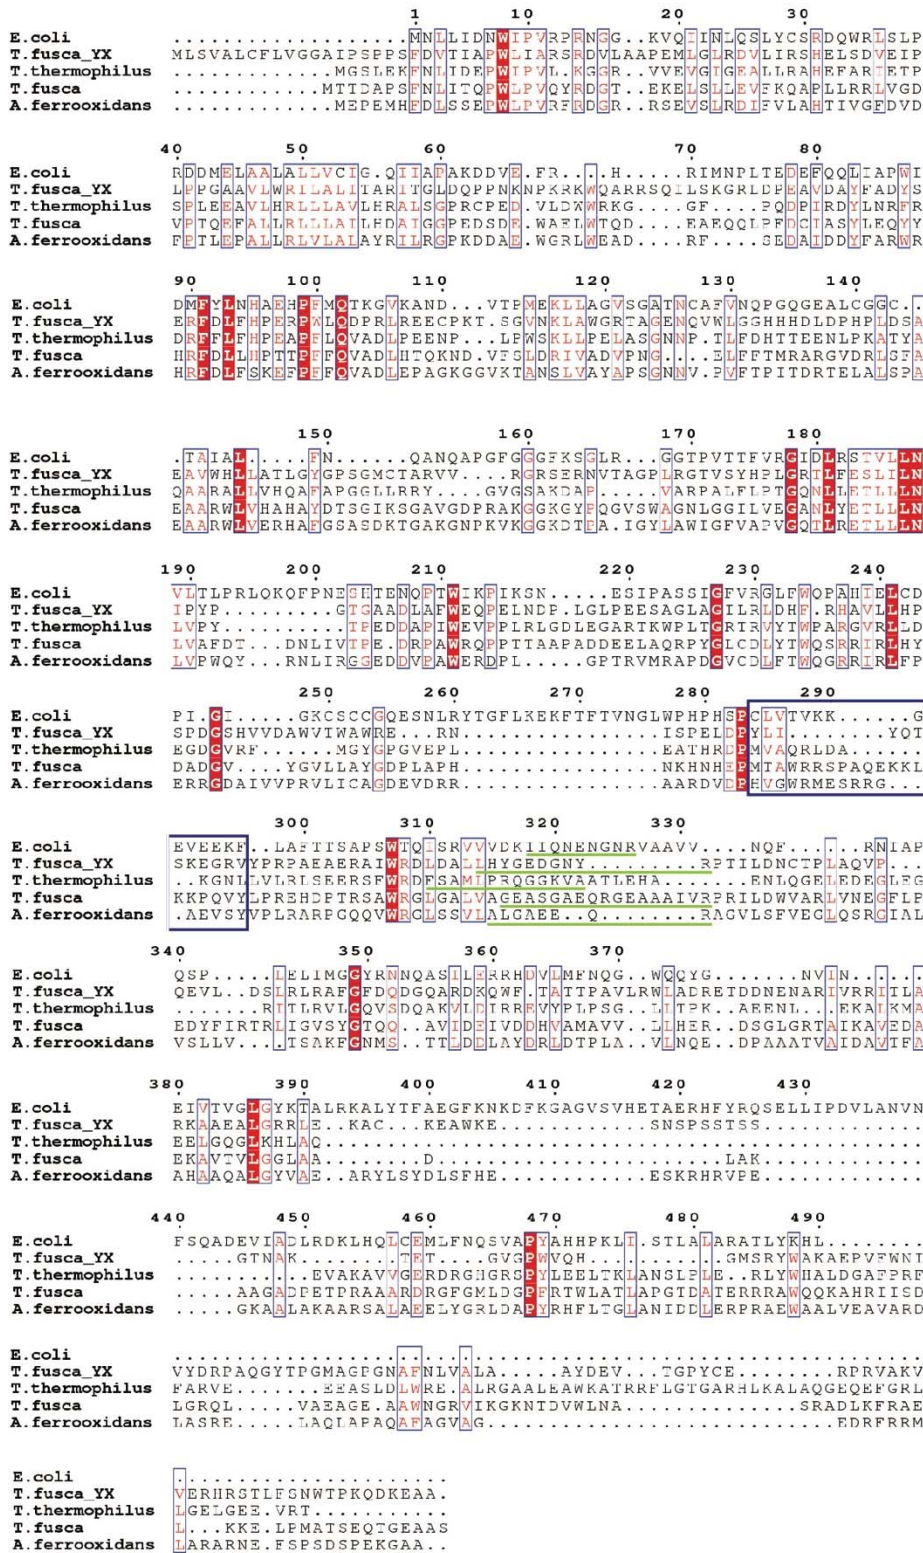

1

2 Supplemental Figure 5. Sequence alignment of Cse1 shows little conservation in L3 and L4. Protein  
 3 sequence alignment of Cse1 subunits of different organisms for which structures are available.

1 *Escherichia coli* (5CD4), *Thermobifida fusca* YX (5U0A), *Thermus thermophilus* (4AN8), *Thermobifida*  
2 *fusca* (3WVO) and *Acidimicrobium ferrooxidans* (4H3T). Identical residues are highlighted in red and  
3 similar residues are in red text. L3 (blue box) and L4 (green, underlined) are indicated and show little  
4 sequence conservation.

5

6

A

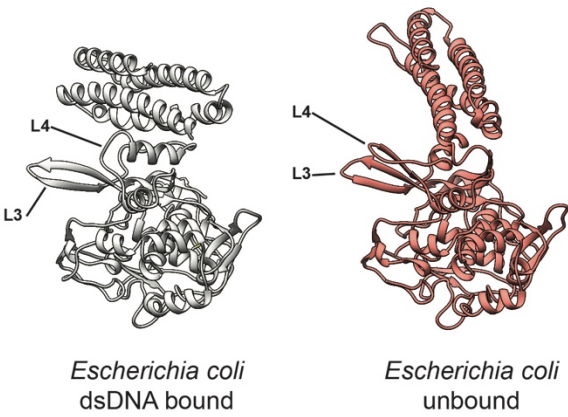

B

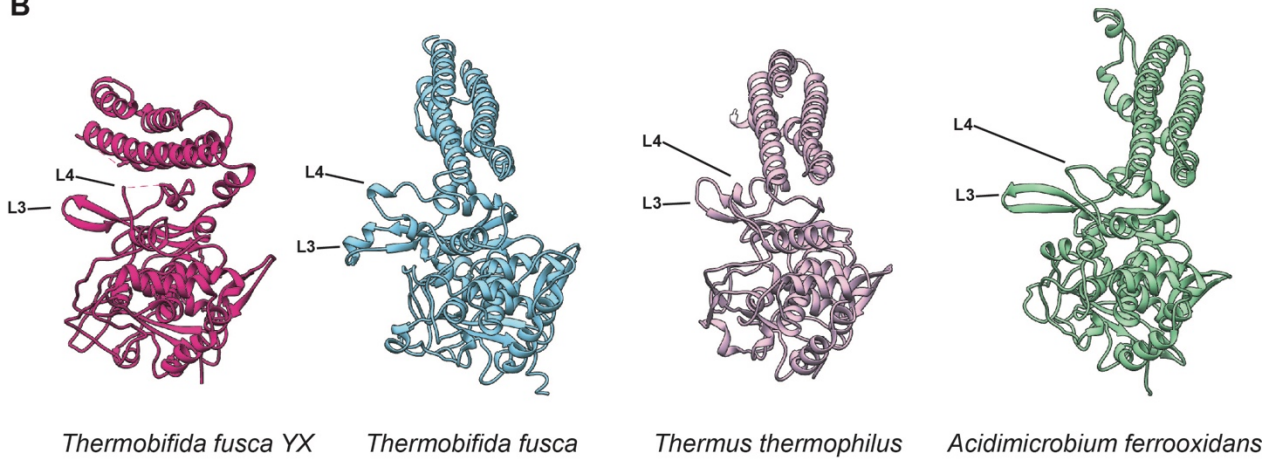

1

2

3

4

5

6

7

**Supplemental Figure 6. Structures of the Cse1 subunit.** A) Structures of the *E. coli* Cse1 subunit from the forked dsDNA bound Cascade (left, 5H9F) and from the unbound Cascade (right, 5CD4). L4 in the dsDNA bound structure has moved 11 Å away from L3. B) The Cse1 subunit from *Thermobifida fusca* YX (5U0A), *Thermobifida fusca* (3WVO), *Thermus thermophilus* (4AN8) and *Acidimicrobium ferrooxidans* (4H3T) all share the conserved structural features L3 and L4.

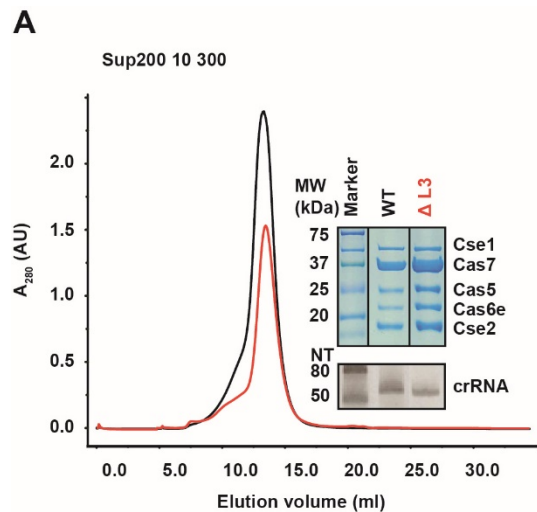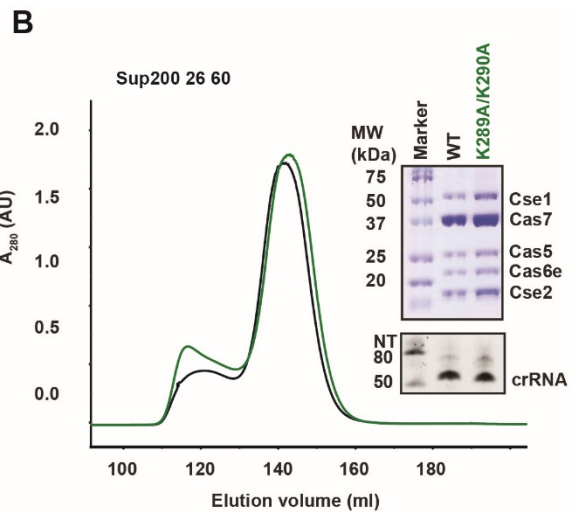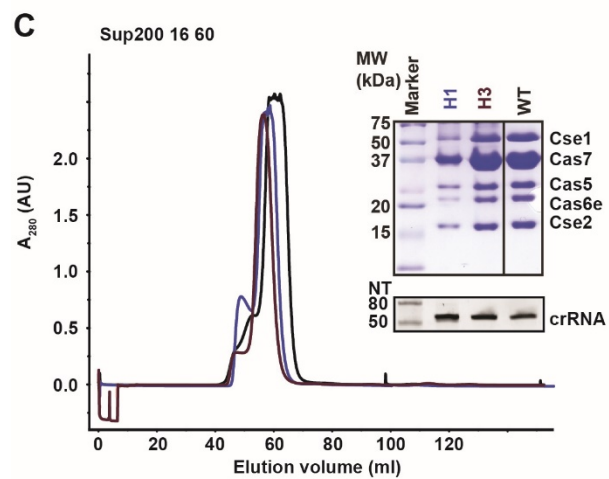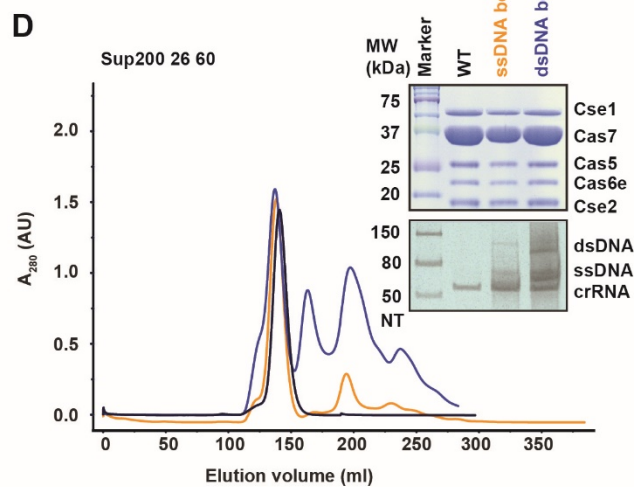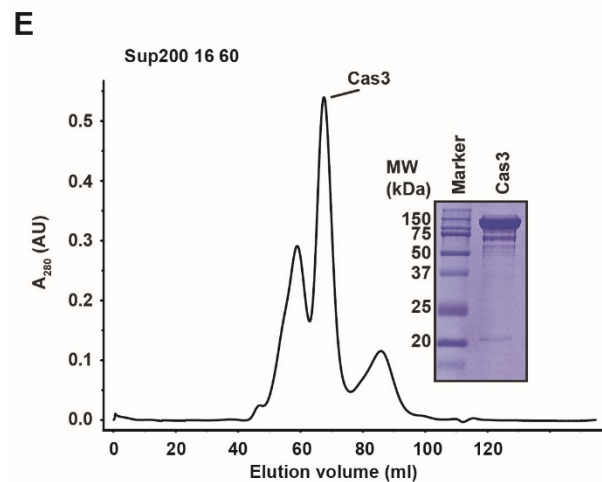

1 **Supplemental Figure 7. Cascade mutants express and purify as WT Cascade. A)** Elution profile of WT  
2 Cascade (black) and  $\Delta$ Loop3 (Cse1  $\Delta$ L285-K296, red). The insert shows a SDS-PAGE gel and (top) and  
3 denaturing polyacrylamide gel (bottom). **B)** Elution profile of WT Cascade (black), Cascade H1 (Cse1  
4 N379A/E380K, blue) and Cascade H3 (Cse1 R194E/K197E, purple). **C)** Elution profile of WT Cascade  
5 (black) and Cascade K289A/K290A (Cse1 K289A/K290A, green). **D)** Elution profile of WT Cascade (black),  
6 Cascade bound to 72-nt ssDNA containing P7 protospacer and 3'-TTC-5' PAM (orange) and Cascade  
7 bound to 72-bp dsDNA containing P7 protospacer and 3'-TTC-5'PAM. **E)** Elution profile of Cas3. The  
8 insert shows a SDS-PAGE gel.

9

10

11



1

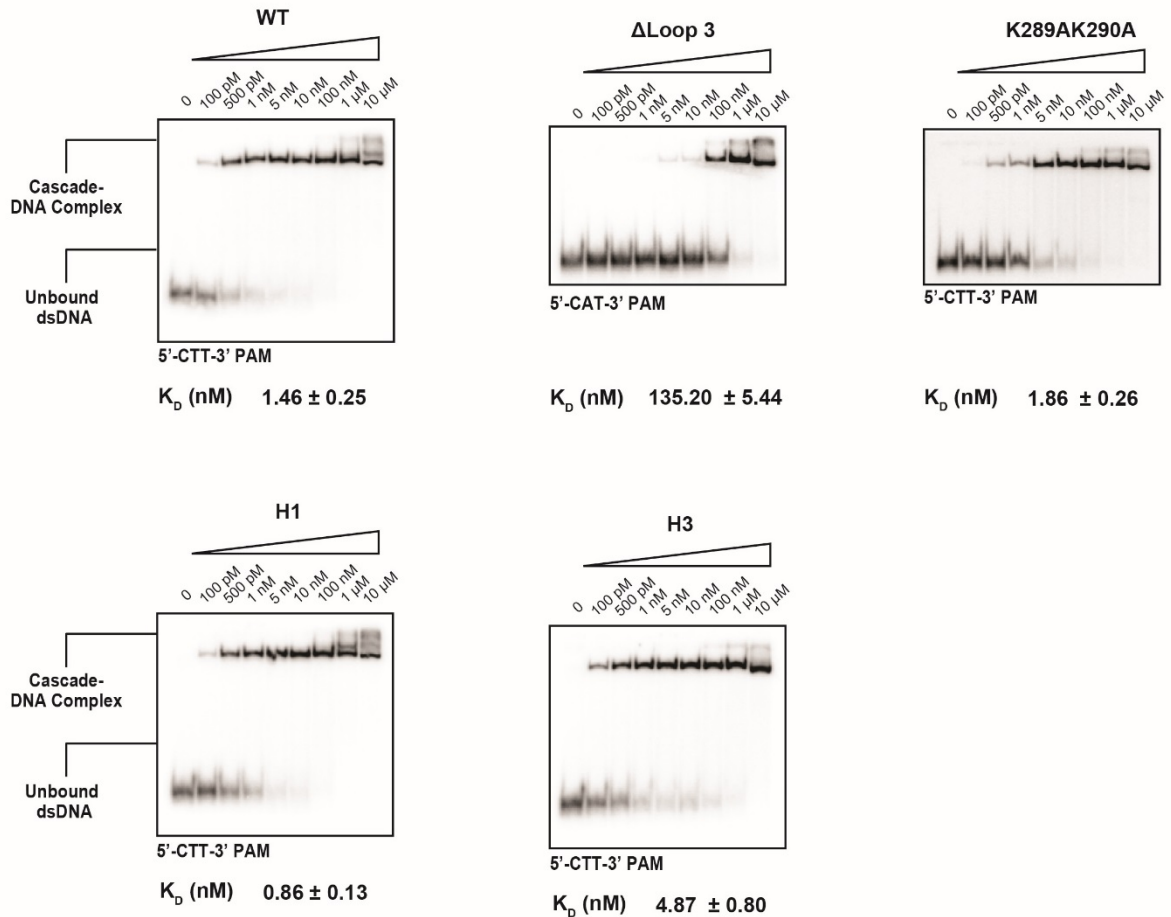

2

3 **Supplemental Figure 8. Deletion of Loop3 results in a major dsDNA binding defect.** Electrophoretic  
4 Mobility Shift Assays (EMSA) show equilibrium dissociation constants for Cascade and Cascade mutants  
5 binding to 72-bp dsDNA containing P7 protospacer and 3'-TTC-5' or 3'-TAC-5' PAM. Only deletion of  
6 Loop 3 resulted in a major binding defect. The H3 mutant resulted in a minor binding defect. Equilibrium  
7 dissociation constant ( $K_D$ ) is calculated using three replicates. Error represents standard deviation.

8

9

10

11

12

13

| Description                           | Target strand (top) and non-target strand (bottom); PAM in black and spacer in blue                                                                                                    |
|---------------------------------------|----------------------------------------------------------------------------------------------------------------------------------------------------------------------------------------|
| 72 bp dsDNA target with 3'-TAC-5' PAM | 3' -CGCGCCGTTTCGGCTTTCG <b>TAC</b> TGCCATAACAAGTCTAGGACCGAACGGTTGTC ACTAACGAGCCCTCAGCGA-5'<br>5' -GCGCGGCAAGCCGAAAGCATG <b>ACGGTATTGTT</b> CAGATCCTGGCTTGCCAACAGTGATTGCTCGGGAGTCGCT-3' |
| 72 bp dsDNA target with 3'-TTC-5' PAM | 3' -CGCGCCGTTTCGGCTTTCG <b>TTC</b> TGCCATAACAAGTCTAGGACCGAACGGTTGTC ACTAACGAGCCCTCAGCGA-5'<br>5' -GCGCGGCAAGCCGAAAGCAAG <b>ACGGTATTGTT</b> CAGATCCTGGCTTGCCAACAGTGATTGCTCGGGAGTCGCT-3' |

1

2 **Supplemental Table 1. Oligonucleotides used in this study.**

3
